# Supplementary material for: High Fermentable Oligosaccharides, Disaccharides, Monosaccharides, and Polyols (FODMAP) Consumption Among Endurance Athletes and Relationship to Gastrointestinal Symptoms
Source: PubMed Central journal article supplement (PMC8095397; doi:10.3389/fnut.2021.637160), 2021-04-20
Supplement: Data_Sheet_1.pdf [file Data_Sheet_1.pdf]

**Supplementary Table 1.** Sports nutrition products analyzed for fermentable oligosaccharides, disaccharides, monosaccharides, and polyols (FODMAP) content with specific flavor and product ingredients. Sports drink/thirst quenchers are abbreviated with Bev (for beverage), solids with either Bar or Waf (for waffle), and gel/gummies with either Gel or Gum (for gummy).

| <b>Products</b>                          | <b>Flavor</b>                 | <b>Ingredients</b>                                                                                                                                                                                                                                                                                                                                                                                                                                                                                                                                                                                                                                                              |
|------------------------------------------|-------------------------------|---------------------------------------------------------------------------------------------------------------------------------------------------------------------------------------------------------------------------------------------------------------------------------------------------------------------------------------------------------------------------------------------------------------------------------------------------------------------------------------------------------------------------------------------------------------------------------------------------------------------------------------------------------------------------------|
| <i>Sports Drink/<br/>Thirst Quencher</i> |                               |                                                                                                                                                                                                                                                                                                                                                                                                                                                                                                                                                                                                                                                                                 |
| Bev1                                     | lemon-lime                    | water, sugar, dextrose, citric acid, salt, sodium citrate, monopotassium phosphate, gum arabic, glycerol ester of rosin, natural flavor, yellow 5                                                                                                                                                                                                                                                                                                                                                                                                                                                                                                                               |
| Bev2                                     | berry                         | water, high fructose corn syrup, less than 0.5% of: citric acid, salt and magnesium chloride and calcium chloride and mono-potassium phosphate (electrolyte sources), natural flavors, modified food starch, calcium disodium EDTA (to protect color), medium chain triglycerides, sucrose acetate isobutyrate, vitamin B3 (niacinamide), vitamin B6 (pyridoxine hydrochloride), vitamin B12, Blue 1                                                                                                                                                                                                                                                                            |
| Bev3                                     | lemon-lime                    | sodium (bicarbonate and carbonate), potassium (bicarbonate), magnesium (sulfate), calcium (carbonate), vitamin c (as ascorbic acid), citric acid, dextrose (d-glucose), natural flavors, monk fruit extract, stevia leaf extract, avocado oil, riboflavin (for color)                                                                                                                                                                                                                                                                                                                                                                                                           |
| Bev4                                     | unflavored                    | dextrose (glucose), sucrose, citric acid, sodium citrate, sea salt, organic flavor, potassium chloride, magnesium citrate, calcium carbonate                                                                                                                                                                                                                                                                                                                                                                                                                                                                                                                                    |
| Bev5                                     | lemon-lime                    | cane sugar, dextrose, sodium citrate, citric acid, magnesium lactate, calcium citrate, potassium citrate, lemon oil, lime oil, lemon juice, lime juice, ascorbic acid (vitamin C)                                                                                                                                                                                                                                                                                                                                                                                                                                                                                               |
| <i>Solid</i>                             |                               |                                                                                                                                                                                                                                                                                                                                                                                                                                                                                                                                                                                                                                                                                 |
| Bar1                                     | white chocolate macadamia nut | organic brown rice syrup, organic rolled oats, soy protein isolate, organic cane syrup, organic roasted soybeans, rice flour, macadamia nuts, organic cane sugar, organic oat fiber, organic soy flour, cocoa butter, organic high oleic sunflower oil, natural flavors, organic cocoa butter, sea salt, soy flour, barley malt extract, soy lecithin, mixed tocopherols (antioxidant), dicalcium phosphate, magnesium oxide, ascorbic acid (vit C), DL-alpha tocopheryl acetate (vit E), beta carotene (vit A), niacinamide (vit B3), ergocalciferol (vit D2), thiamine mononitrate (vit B1), pyridoxine hydrochloride (vit B6), riboflavin (vit B2), cyanocobalamin (vit B12) |
| Waf1                                     | honey                         | organic wheat flour, organic palm fruit oil, organic rice syrup, organic can sugar, organic honey, organic whole wheat flour, organic soy flour, sea salt, soy lecithin, organic spices, baking soda                                                                                                                                                                                                                                                                                                                                                                                                                                                                            |

**Supplementary Table 1 cont.**

| <b>Products</b>           | <b>Flavor</b>     | <b>Ingredients</b>                                                                                                                                                                                                                                                                                       |
|---------------------------|-------------------|----------------------------------------------------------------------------------------------------------------------------------------------------------------------------------------------------------------------------------------------------------------------------------------------------------|
| Bar2                      | salted<br>caramel | brown rice syrup, gluten-free oats, cashew butter, brown rice flour, honey, salted caramel toffee pieces (cane sugar, butter, sea salt, soy lecithin, citric acid), peanuts, rice protein, crisp rice (rice flour, sugar, salt, calcium carbonate), flaxseeds, natural flavors, sea salt                 |
| Waf2                      | salted<br>caramel | gluten free flour blend (organic rice flour, organic potato starch, organic tapioca flour), organic palm fruit oil, organic brown rice syrup, organic cane sugar, organic eggs, organic soy flour, sea salt, organic honey, natural flavor, xanthan gum, baking soda, soy lecithin                       |
| <i><u>Gel/Gummies</u></i> |                   |                                                                                                                                                                                                                                                                                                          |
| Gel1                      | vanilla           | maltodextrin, water, fructose, l-leucine, potassium citrate, sodium citrate, citric acid, calcium carbonate, l-valine, sea salt, natural flavor, green tea (leaf) extract (contains caffeine), gellan gum, l-isoleucine, sunflower oil, sodium benzoate (preservative), potassium sorbate (preservative) |
| Gel2A                     | honey             | honey, water, potassium citrate, salt, niacinamide (vit B3), calcium pantothenate (vit B5), pyridoxine hydrochloride (vit B6), riboflavin (vit B2), thiamine mononitrate (vit B1), cyanocobalamin (vit B12)                                                                                              |
| Gel2B                     | vanilla           | organic tapioca syrup, organic honey, water, potassium citrate, organic vanilla flavor, citric acid, salt                                                                                                                                                                                                |
| Gel3A                     | vanilla           | maltodextrin, water, energy smart ® (grape juice, rice dextrin), vanilla extract, cultured dextrose, citric acid, potassium chloride, salt, l-leucine, l-alanine, l-valine, l-isoleucine                                                                                                                 |
| Gel3B                     | apple<br>cinnamon | maltodextrin, water, apple juice concentrate, energy smart ® (grape juice, rice dextrin), cultured dextrose, cinnamon, ascorbic acid, vanilla extract, malic acid, potassium carbonate, salt, l-leucine, l-alanine, l-valine, l-isoleucine                                                               |
| Gel4                      | vanilla           | organic maltodextrin, organic dried cane syrup, water, natural flavor, sea salt, potassium citrate                                                                                                                                                                                                       |
| Gum1                      | citrus            | organic tapioca syrup, organic dried cane syrup, organic maltodextrin, pectin, citric acid, potassium citrate, natural flavor, sea salt, organic sunflower oil, carnauba wax                                                                                                                             |

**Supplementary Table 2.** Nutrition product type consumed before training and gastrointestinal (GI) symptoms during training.

| Nutrition                              | Symptom             | H*<br>(n)       | Total<br>p | Group 1 (n,<br>mean rank)† | Group 2 (n,<br>mean rank)† | p‡           |      |
|----------------------------------------|---------------------|-----------------|------------|----------------------------|----------------------------|--------------|------|
| Sports drink/thirst<br>quencher        | GI cramps/pain      | 13.669<br>(404) | .008       | Never                      | Always                     | .003         |      |
|                                        |                     |                 |            | (146, 209.27)              | (22, 118.50)               |              |      |
|                                        |                     |                 |            | Rarely                     | Always                     | .005         |      |
|                                        |                     |                 |            |                            | (104, 208.98)              | (22, 118.50) |      |
|                                        |                     |                 |            |                            | Sometimes                  | Always       | .013 |
|                                        |                     |                 |            |                            | (97, 202.57)               | (22, 118.50) |      |
|                                        | Urge to<br>defecate | 14.213<br>(403) | .007       | Often                      | Always                     | .031         |      |
| (35, 207.61)                           |                     |                 |            | (22, 118.50)               |                            |              |      |
| Never                                  |                     |                 |            | Always                     | .019                       |              |      |
|                                        |                     |                 |            | (145, 205.59)              | (24, 129.40)               |              |      |
|                                        |                     |                 |            | Rarely                     | Always                     | .003         |      |
|                                        |                     |                 |            | (104, 219.49)              | (24, 129.40)               |              |      |
| Solid food                             | GI cramps/pain      | 12.165<br>(410) | .016       | Sometimes                  | Always                     | .036         |      |
|                                        |                     |                 |            | (95, 203.34)               | (24, 129.40)               |              |      |
|                                        |                     |                 |            | Never                      | Often                      | .049         |      |
|                                        |                     |                 |            | (28, 162.38)               | (113, 229.13)              |              |      |
|                                        | Bloating            | 15.861<br>(410) | .003       | Never                      | Sometimes                  | .009         |      |
| (28, 138.14)                           |                     |                 |            | (142, 213.56)              |                            |              |      |
| Never                                  |                     |                 |            | Often                      | .002                       |              |      |
|                                        |                     |                 |            | (28, 138.14)               | (114, 223.63)              |              |      |
| Gel/gummy                              | GI cramps/pain      | 15.112<br>(402) | .004       | Sometimes                  | Always                     | .001         |      |
|                                        |                     |                 |            | (72, 233.05)               | (22, 131.34)               |              |      |
| Homemade<br>product/<br>something else | Bloating            | 28.536<br>(404) | <.001      | Never                      | Sometimes                  | <.001        |      |
|                                        |                     |                 |            | (160, 176.21)              | (97, 237.90)               |              |      |
|                                        |                     |                 |            | Never                      | Always                     | .002         |      |
|                                        |                     |                 |            |                            | (160, 176.21)              | (21, 271.00) |      |
|                                        |                     |                 |            |                            | Rarely                     | Always       | .021 |
|                                        |                     |                 |            |                            | (83, 189.51)               | (21, 271.00) |      |
|                                        | Constipation        | 17.492<br>(400) | .002       | Never                      | Often                      | .027         |      |
| (159, 187.07)                          |                     |                 |            | (46, 232.03)               |                            |              |      |
| Rarely                                 |                     |                 |            | Often                      | .038                       |              |      |
|                                        |                     |                 |            | (82, 184.30)               | (46, 232.03)               |              |      |

\*Kruskal-Wallis H value is also  $\chi^2(4)$

† Post hoc pairwise comparisons with Dunn's procedure and Bonferroni correction comparing the product consumption frequency categories shown under Group 1 to Group 2. The n of each group indicates the number of participants responding with that nutrition product consumption frequency. Mean ranks of the Kruskal-Wallis H test are used to compare the effect of usage frequency on specific GI symptoms, with larger mean ranks indicating more frequent symptoms.

‡ p-value for individual pairwise comparisons

**Supplementary Table 3.** Nutrition product type consumed before training and gastrointestinal (GI) symptoms within 2hrs after training.

| <b>Nutrition</b>                    | <b>Symptom</b> | <b>H*<br/>(n)</b> | <b>Total<br/>p</b> | <b>Group 1 (n,<br/>mean rank)†</b> | <b>Group 2 (n,<br/>mean rank)†</b> | <b>p‡</b> |
|-------------------------------------|----------------|-------------------|--------------------|------------------------------------|------------------------------------|-----------|
| Sports drink/thirst quencher        | Flatulence     | 13.714<br>(403)   | .008               | Never<br>(145, 178.85)             | Rarely<br>(104, 225.96)            | .010      |
| Sports drink/energy drink           | Diarrhea       | 11.278<br>(407)   | .024               | Never<br>(208, 193.28)             | Rarely<br>(105, 234.34)            | .017      |
|                                     | Constipation   | 13.439<br>(404)   | .009               | Never<br>(207, 194.35)             | Rarely<br>(104, 227.00)            | .025      |
| Gel/gummy                           | Bloating       | 10.528<br>(403)   | .032               | Never<br>(160, 186.01)             | Sometimes<br>(71, 230.11)          | .038      |
|                                     | Flatulence     | 9.983<br>(401)    | .041               | Never<br>(159, 186.66)             | Sometimes<br>(72, 235.93)          | .017      |
| Homemade product/<br>something else | GI cramps/pain | 12.916<br>(404)   | .012               | Never<br>(161, 181.80)             | Always<br>(21, 254.19)             | .046      |

\*Kruskal-Wallis H value is also  $\chi^2(4)$

† Post hoc pairwise comparisons with Dunn's procedure and Bonferroni correction comparing the product consumption frequency categories shown under Group 1 to Group 2. The n of each group indicates the number of participants responding with that nutrition product consumption frequency. Mean ranks of the Kruskal-Wallis H test are used to compare the effect of usage frequency on specific GI symptoms, with larger mean ranks indicating more frequent symptoms.

‡ p-value for individual pairwise comparisons

**Supplementary Table 4.** Nutrition product type consumed during training and gastrointestinal (GI) symptoms during training.

| Nutrition                              | Symptom        | H*<br>(n)       | Total<br>p | Group 1 (n,<br>mean rank)† | Group 2 (n,<br>mean rank)† | p‡           |      |
|----------------------------------------|----------------|-----------------|------------|----------------------------|----------------------------|--------------|------|
| Solid food                             | GI cramps/pain | 15.065<br>(406) | .005       | Never                      | Always                     | .027         |      |
|                                        |                |                 |            | (102, 198.82)              | (19, 115.58)               |              |      |
|                                        |                |                 |            | Rarely                     | Always                     | .008         |      |
|                                        |                |                 |            | (84, 210.44)               | (19, 115.58)               |              |      |
|                                        |                |                 |            | Sometimes                  | Always                     | .012         |      |
| (134, 204.04)                          | (19, 115.58)   |                 |            |                            |                            |              |      |
|                                        | Constipation   | 10.757<br>(402) | .029       | Often                      | Always                     | .001         |      |
|                                        |                |                 |            | (67, 225.78)               | (19, 115.58)               |              |      |
| Gel/gummy                              | Bloating       | 10.314<br>(407) | .035       | Never                      | Often                      | .017         |      |
|                                        |                |                 |            | (47, 161.66)               | (125, 220.30)              |              |      |
|                                        |                |                 |            | Urge to<br>defecate        | Sometimes                  | .012         |      |
| (47, 158.13)                           | (130, 219.82)  |                 |            |                            |                            |              |      |
| Homemade<br>product/<br>something else | Bloating       | 14.850<br>(403) | .005       | Never                      | Rarely                     | .008         |      |
|                                        |                |                 |            | (197, 182.67)              | (75, 232.16)               |              |      |
|                                        |                |                 |            | Constipation               | Rarely                     | <.001        |      |
|                                        |                | 23.898<br>(399) | <.001      | Never                      | (195, 178.76)              | (75, 228.76) |      |
|                                        |                |                 |            | Never                      | (195, 178.76)              | (80, 215.11) | .020 |

\*Kruskal-Wallis H value is also  $\chi^2(4)$

† Post hoc pairwise comparisons with Dunn's procedure and Bonferroni correction comparing the product consumption frequency categories shown under Group 1 to Group 2. The n of each group indicates the number of participants responding with that nutrition product consumption frequency. Mean ranks of the Kruskal-Wallis H test are used to compare the effect of usage frequency on specific GI symptoms, with larger mean ranks indicating more frequent symptoms.

‡ p-value for individual pairwise comparisons

**Supplementary Table 5.** Nutrition product type consumed during training and gastrointestinal (GI) symptoms within 2hrs after training.

| <b>Nutrition</b>                       | <b>Symptom</b>      | <b>H*<br/>(n)</b> | <b>Total<br/>p</b> | <b>Group 1 (n,<br/>mean rank)†</b> | <b>Group 2 (n,<br/>mean rank)†</b> | <b>p‡</b> |      |
|----------------------------------------|---------------------|-------------------|--------------------|------------------------------------|------------------------------------|-----------|------|
| Gel/gummy                              | Bloating            | 10.179<br>(408)   | .038               | Never                              | Sometimes                          | .029      |      |
|                                        |                     |                   |                    | (47, 158.86)                       | (131, 213.67)                      |           |      |
|                                        | Flatulence          | 12.978<br>(406)   | .011               | Never                              | Sometimes                          | .010      |      |
|                                        |                     |                   |                    | (46, 148.54)                       | (131, 211.83)                      |           |      |
|                                        |                     |                   |                    | Never                              | Often                              |           | .015 |
|                                        |                     |                   |                    | (46, 148.54)                       | (125, 209.64)                      |           |      |
|                                        | Urge to<br>defecate | 12.092<br>(407)   | .017               | Never                              | Always                             | .027      |      |
|                                        |                     |                   |                    | (46, 148.54)                       | (49, 217.44)                       |           |      |
|                                        |                     |                   |                    | Never                              | Sometimes                          |           | .016 |
|                                        |                     |                   |                    | (47, 150.62)                       | (131, 211.42)                      |           |      |
|                                        | Defecation          | 13.888<br>(407)   | .008               | Never                              | Often                              | .024      |      |
|                                        |                     |                   |                    | (47, 150.62)                       | (126, 209.57)                      |           |      |
| Never                                  |                     |                   |                    | Always                             | .035                               |           |      |
| (47, 150.62)                           |                     |                   |                    | (48, 218.57)                       |                                    |           |      |
| Defecation                             | 13.888<br>(407)     | .008              | Never              | Sometimes                          | .010                               |           |      |
|                                        |                     |                   | (47, 147.06)       | (131, 210.47)                      |                                    |           |      |
|                                        |                     |                   | Never              | Often                              |                                    | .004      |      |
|                                        |                     |                   | (47, 150.62)       | (125, 215.41)                      |                                    |           |      |
| Defecation                             | 13.888<br>(407)     | .008              | Never              | Always                             | .041                               |           |      |
|                                        |                     |                   | (47, 150.62)       | (49, 213.59)                       |                                    |           |      |
|                                        |                     |                   | Never              | Rarely                             |                                    | .027      |      |
|                                        |                     |                   | (198, 186.73)      | (74, 231.59)                       |                                    |           |      |
| Homemade<br>product/<br>something else | GI cramps/pain      | 11.749<br>(403)   | .019               | Never                              | Rarely                             | .027      |      |
|                                        | Bloating            | 10.010<br>(403)   | .040               | Never                              | Rarely                             | .040      |      |
|                                        | Constipation        | 15.795<br>(401)   | .003               | Never                              | Rarely                             | .001      |      |
|                                        |                     |                   |                    | (197, 186.95)                      | (75, 233.43)                       |           |      |

\*Kruskal-Wallis H value is also  $\chi^2(4)$

† Post hoc pairwise comparisons with Dunn's procedure and Bonferroni correction comparing the product consumption frequency categories shown under Group 1 to Group 2. The n of each group indicates the number of participants responding with that nutrition product consumption frequency. Mean ranks of the Kruskal-Wallis H test are used to compare the effect of usage frequency on specific GI symptoms, with larger mean ranks indicating more frequent symptoms.

‡ p-value for individual pairwise comparisons

**Supplementary Table 6.** Nutrition product type consumed before competition and gastrointestinal (GI) symptoms during competition.

| <b>Nutrition</b>                       | <b>Symptom</b> | <b>H*<br/>(n)</b> | <b>Total<br/>p</b> | <b>Group 1 (n,<br/>mean rank)†</b> | <b>Group 2 (n,<br/>mean rank)†</b> | <b>p‡</b> |
|----------------------------------------|----------------|-------------------|--------------------|------------------------------------|------------------------------------|-----------|
| Sports drink/<br>energy drink          | Bloating       | 14.297<br>(398)   | .006               | Never<br>(201, 180.75)             | Rarely<br>(73, 227.54)             | .012      |
|                                        | Constipation   | 12.466<br>(393)   | .014               | Never<br>(200, 189.37)             | Rarely<br>(71, 227.02)             | .007      |
| Solid food                             | Constipation   | 10.687<br>(399)   | .030               | Sometimes<br>(79, 225.08)          | Always<br>(138, 187.77)            | .012      |
| Homemade<br>product/<br>something else | GI cramps/pain | 15.024<br>(400)   | .005               | Never<br>(182, 181.28)             | Sometimes<br>(75, 233.51)          | .005      |
|                                        | Bloating       | 16.295<br>(400)   | .003               | Never<br>(182, 178.50)             | Sometimes<br>(75, 232.05)          | .002      |
|                                        | Defecation     | 13.148<br>(395)   | .011               | Never<br>(180, 178.26)             | Sometimes<br>(74, 221.95)          | .024      |

\*Kruskal-Wallis H value is also  $\chi^2(4)$

† Post hoc pairwise comparisons with Dunn's procedure and Bonferroni correction comparing the product consumption frequency categories shown under Group 1 to Group 2. The n of each group indicates the number of participants responding with that nutrition product consumption frequency. Mean ranks of the Kruskal-Wallis H test are used to compare the effect of usage frequency on specific GI symptoms, with larger mean ranks indicating more frequent symptoms.

‡ p-value for individual pairwise comparisons

**Supplementary Table 7.** Nutrition product type consumed before competition and gastrointestinal (GI) symptoms within 2hrs after competition.

| <b>Nutrition</b>                           | <b>Symptom</b>      | <b>H*<br/>(n)</b> | <b>Total<br/>p</b> | <b>Group 1 (n,<br/>mean rank)†</b> | <b>Group 2 (n,<br/>mean rank)†</b> | <b>p‡</b>                 |       |
|--------------------------------------------|---------------------|-------------------|--------------------|------------------------------------|------------------------------------|---------------------------|-------|
| Sports<br>drink/energy drink<br>Solid food | Flatulence          | 12.254<br>(399)   | .016               | Never<br>(200, 183.86)             | Always<br>(28, 247.50)             | .042                      |       |
|                                            | Urge to<br>defecate | 12.870<br>(401)   | .012               | Never<br>(33, 145.61)              | Sometimes<br>(80, 226.10)          | .012                      |       |
|                                            |                     | Defecation        | 22.409<br>(403)    | <.001                              | Never<br>(33, 125.95)              | Rarely<br>(59, 201.07)    | .020  |
|                                            |                     |                   |                    |                                    | Never<br>(33, 125.95)              | Sometimes<br>(79, 232.31) | <.001 |
|                                            |                     |                   |                    |                                    | Never<br>(33, 125.95)              | Often<br>(93, 192.67)     | .032  |
|                                            |                     |                   |                    | Never<br>(33, 125.95)              | Always<br>(139, 209.47)            | .001                      |       |
| Gel/gummy                                  | Bloating            | 16.457<br>(398)   | .002               | Never<br>(136, 175.89)             | Rarely<br>(70, 231.68)             | .003                      |       |
| Homemade<br>product/<br>something else     | GI cramps/pain      | 20.074<br>(400)   | <.001              | Never<br>(181, 175.22)             | Sometimes<br>(75, 232.91)          | .001                      |       |
|                                            | Bloating            | 15.267<br>(399)   | .004               | Never<br>(181, 177.96)             | Sometimes<br>(75, 220.35)          | .037                      |       |
|                                            | Constipation        | 12.353<br>(395)   | .015               | Never<br>(179, 183.44)             | Sometimes<br>(74, 219.35)          | .029                      |       |

\*Kruskal-Wallis H value is also  $\chi^2(4)$

† Post hoc pairwise comparisons with Dunn's procedure and Bonferroni correction comparing the product consumption frequency categories shown under Group 1 to Group 2. The n of each group indicates the number of participants responding with that nutrition product consumption frequency. Mean ranks of the Kruskal-Wallis H test are used to compare the effect of usage frequency on specific GI symptoms, with larger mean ranks indicating more frequent symptoms.

‡ p-value for individual pairwise comparisons



**Supplementary Table 8.** Nutrition product type consumed during competition and gastrointestinal (GI) symptoms during competition.

| <b>Nutrition</b>                       | <b>Symptom</b>      | <b>H*<br/>(n)</b> | <b>Total<br/>p</b> | <b>Group 1 (n,<br/>mean rank)†</b> | <b>Group 2 (n,<br/>mean rank)†</b> | <b>p‡</b> |
|----------------------------------------|---------------------|-------------------|--------------------|------------------------------------|------------------------------------|-----------|
| Solid food                             | Bloating            | 10.199<br>(398)   | .037               | Never<br>(104, 175.08)             | Sometimes<br>(120, 216.57)         | .034      |
| Gel/gummy                              | Urge to<br>defecate | 10.811<br>(408)   | .029               | Never<br>(37, 153.93)              | Sometimes<br>(53, 207.70)          | .045      |
|                                        |                     |                   |                    | Never<br>(37, 153.93)              | Often<br>(142, 215.18)             | .031      |
|                                        | Bloating            | 9.676<br>(412)    | .046               | Never<br>(36, 154.54)              | Sometimes<br>(140, 216.15)         | .024      |
| Homemade<br>product/<br>something else | Bloating            | 13.729<br>(396)   | .008               | Never<br>(36, 154.54)              | Often<br>(156, 198.20)             | .048      |
|                                        |                     |                   |                    | Never<br>(209, 182.84)             | Rarely<br>(69, 229.10)             | .015      |

\*Kruskal-Wallis H value is also  $\chi^2(4)$

† Post hoc pairwise comparisons with Dunn's procedure and Bonferroni correction comparing the product consumption frequency categories shown under Group 1 to Group 2. The n of each group indicates the number of participants responding with that nutrition product consumption frequency. Mean ranks of the Kruskal-Wallis H test are used to compare the effect of usage frequency on specific GI symptoms, with larger mean ranks indicating more frequent symptoms.

‡ p-value for individual pairwise comparisons

**Supplementary Table 9.** Nutrition product type consumed during competition and gastrointestinal (GI) symptoms within 2hrs after competition.

| <b>Nutrition</b>                    | <b>Symptom</b> | <b>H*<br/>(n)</b> | <b>Total<br/>p</b> | <b>Group 1 (n,<br/>mean rank)†</b> | <b>Group 2 (n,<br/>mean rank)†</b> | <b>p‡</b> |
|-------------------------------------|----------------|-------------------|--------------------|------------------------------------|------------------------------------|-----------|
| Homemade product/<br>something else | GI cramps/pain | 15.154<br>(397)   | .004               | Never<br>(209, 182.44)             | Rarely<br>(69, 230.93)             | .013      |

\*Kruskal-Wallis H value is also  $\chi^2(4)$

† Post hoc pairwise comparisons with Dunn's procedure and Bonferroni correction comparing the product consumption frequency categories shown under Group 1 to Group 2. The n of each group indicates the number of participants responding with that nutrition product consumption frequency. Mean ranks of the Kruskal-Wallis H test are used to compare the effect of usage frequency on specific GI symptoms, with larger mean ranks indicating more frequent symptoms.

‡ p-value for individual pairwise comparisons

**Supplementary Table 10.** Average daily nutritional intake of endurance athletes (n=73).

| <b>Nutrient</b> | <b>Daily intake (Mean±SD)</b> |
|-----------------|-------------------------------|
| Energy          | 2157.0±778.6                  |
| Carbohydrate    | 233.8±97.9                    |
| Fat             | 89.9±41.2                     |
| Protein         | 99.1±37.5                     |
| Fiber           | 36.4±19.1                     |
